# Supplementary material for: Effect of Passiflora setacea juice and its phenolic metabolites on insulin resistance markers in overweight individuals and on microglial cell activity
Source: Royal Society of Chemistry journal article supplement (doi:10.1039/d1fo04334j), 2022-01-01
Supplement: d1fo04334j1.pdf [file d1fo04334j1.pdf]

|                                    |                |  |  |  |  |  |  |  |  |
|------------------------------------|----------------|--|--|--|--|--|--|--|--|
| 30. Strawberry                     | 1 tbsp         |  |  |  |  |  |  |  |  |
| 31. Raw cabbage                    | 4 tbsp         |  |  |  |  |  |  |  |  |
| 32. Soybean                        | 1 tbsp         |  |  |  |  |  |  |  |  |
| 33. Pineapple juice from a box     | 1 cup (250mL)  |  |  |  |  |  |  |  |  |
| 34. Natural Pineapple Juice        | 1 cup (250mL)  |  |  |  |  |  |  |  |  |
| 35. Orange juice from a box        | 1 cup (250mL)  |  |  |  |  |  |  |  |  |
| 36. Natural orange juice           | ½ cup (130mL)  |  |  |  |  |  |  |  |  |
| 37. Lemon juice from a box         | 2 cups (500mL) |  |  |  |  |  |  |  |  |
| 38. Natural lemon juice            | 2 cups (500mL) |  |  |  |  |  |  |  |  |
| 39. Boxed apple juice –            | 1 cup (250mL)  |  |  |  |  |  |  |  |  |
| 40. Natural apple juice            | 1 cup (250mL)  |  |  |  |  |  |  |  |  |
| 41. Passion fruit juice from a box | 2 cups (500mL) |  |  |  |  |  |  |  |  |
| 42. Natural passion fruit juice    | 2 cups (500mL) |  |  |  |  |  |  |  |  |
| 43. Strawberry juice from a box    | 1 cup (250mL)  |  |  |  |  |  |  |  |  |
| 44. Natural strawberry juice       | 1 cup (250mL)  |  |  |  |  |  |  |  |  |
| 45. Grape Juice Box                | ½ cup (130mL)  |  |  |  |  |  |  |  |  |
| 46. Natural grape juice            | ½ cup (130mL)  |  |  |  |  |  |  |  |  |
| 47. Tangerine (silver)             | 1 large unit   |  |  |  |  |  |  |  |  |
| 48. Grape                          | 15 units       |  |  |  |  |  |  |  |  |
| 49. Açai (juice or cream)          | 200 mL         |  |  |  |  |  |  |  |  |

Tbsp = table spoon; Tc = tea cup.

**Table S3** Polyphenols identified in *P. setacea*'s pulp and their respective phenolic metabolites found in the plasma of volunteers after 14 days of consumption of PS50g.

| <b>Polyphenols</b>                                                      | <b>Phenolic metabolites</b>  |
|-------------------------------------------------------------------------|------------------------------|
| Orientin (luteolin-8C-glucoside)<br>Isoorientin (luteolin-6C-glucoside) | Hydroxi-luteolin-glucuronide |
|                                                                         | Isoorientin-Sulfate          |
| Proanthocyanidins                                                       | Epicatechin-Glucuronide      |

**Table S4** Molecular docking results on the interactions of phenolic metabolites found in the plasma of volunteers after 14 days of consumption of *Passiflora setacea* and proteins involved in the insulin signaling pathway Akt, IRS and PPAR- $\gamma$ , using MCULE software. Values expressed in kcal/mol.

| Docking (kcal/mol) |                           |                         |                              |
|--------------------|---------------------------|-------------------------|------------------------------|
|                    | Epicatechin-7-Glucuronide | Isoorientin 7- -Sulfate | Hydroxi-luteolin Glucuronide |
| Akt                | -10                       | -9.5                    | -7.8                         |
| IRS                | -8.9                      | -8.9                    | -7.5                         |
| PPAR- $\gamma$     | -9.5                      | -9.3                    | -8                           |
